# Supplementary material for: Endovascular treatment for basilar artery occlusion: a meta-analysis
Source: PubMed Central journal article supplement — Stroke Vasc Neurol. 2022 Aug 5;8(1):1–3. doi: 10.1136/svn-2022-001740 (PMC9985799; doi:10.1136/svn-2022-001740), 2022-08-05
Supplement: svn-2022-001740supp001.pdf [file svn-2022-001740supp001.pdf]

Supplementary Table 1.

|                                | <b>BEST (2019)</b>                                                                                                                                                                                                                                                                                                                | <b>BASICS (2021)</b>                                                                                                                                                                                                                                         | <b>ATTENTION (2022)</b>                                                                                                                                                                                                                                                                                                                                                                                                                                            | <b>BAOCHE (2022)</b>                                                                                                                                                                                                                                                                                                                                                                                                                                                                                                    |
|--------------------------------|-----------------------------------------------------------------------------------------------------------------------------------------------------------------------------------------------------------------------------------------------------------------------------------------------------------------------------------|--------------------------------------------------------------------------------------------------------------------------------------------------------------------------------------------------------------------------------------------------------------|--------------------------------------------------------------------------------------------------------------------------------------------------------------------------------------------------------------------------------------------------------------------------------------------------------------------------------------------------------------------------------------------------------------------------------------------------------------------|-------------------------------------------------------------------------------------------------------------------------------------------------------------------------------------------------------------------------------------------------------------------------------------------------------------------------------------------------------------------------------------------------------------------------------------------------------------------------------------------------------------------------|
| <b>Trial design</b>            | Multicenter, prospective, open-label, randomized, controlled, blinded-endpoint<br>1:1                                                                                                                                                                                                                                             | Multicenter, prospective, open-label, randomized, controlled, blinded-endpoint<br>1:1                                                                                                                                                                        | Prospective, open-label, randomized, blinded outcome assessment<br>2:1                                                                                                                                                                                                                                                                                                                                                                                             | Multicenter, prospective, open-label, randomized, controlled, blinded-endpoint<br>1:1                                                                                                                                                                                                                                                                                                                                                                                                                                   |
| <b>Main inclusion criteria</b> | <ul style="list-style-type: none"> <li>• BAO (CTA/MRA/DSA),</li> <li>• Age 18 years or older,</li> <li>• Pre-stroke mRS score 0-2,</li> <li>• no ICH, significant cerebellar mass effect, acute hydrocephalus, or extensive bilateral brainstem ischemia (CT/MRI),</li> <li>• Symptom onset to randomization: 8 hours.</li> </ul> | <ul style="list-style-type: none"> <li>• BAO (CTA/MRA),</li> <li>• No ICH; extensive, bilateral brainstem infarction; cerebellar mass effect; or acute hydrocephalus evident on neuroimaging,</li> <li>• Symptom onset to randomization: 6 hours.</li> </ul> | <ul style="list-style-type: none"> <li>• BAO (CTA/MRA/DSA),</li> <li>• Age 18 years or older,</li> <li>• Baseline NIHSS <math>\geq 10</math>,</li> <li>• No ICH (NCCT/CTA-SI/DWI),</li> <li>• If age <math>\leq 80</math> years: pre-stroke mRS score 0-2, PC-ASPECTS <math>\geq 6</math>,</li> <li>• If age <math>&gt; 80</math> years: pre-stroke mRS score 0-1, PC-ASPECTS <math>\geq 8</math>,</li> <li>• Symptom onset to randomization: 12 hours.</li> </ul> | <ul style="list-style-type: none"> <li>• BAO or intracranial segments of both vertebral arteries (CTA/MRA/DSA),</li> <li>• Age 18-80 years,</li> <li>• Baseline NIHSS <math>\geq 6</math>,</li> <li>• Pre-stroke mRS score 0-1,</li> <li>• PC-ASPECTS <math>\geq 6</math>,</li> <li>• Pons-midbrain-index <math>\leq 2</math>,</li> <li>• No ICH, significant cerebellar mass effect, or unilateral or bilateral thalamic infarction on neuroimaging,</li> <li>• Symptom onset to randomization: 6-24 hours.</li> </ul> |

|                                                |                                                                                                                |                                                                                     |                                                                                                                                                                  |                                                                                                                          |
|------------------------------------------------|----------------------------------------------------------------------------------------------------------------|-------------------------------------------------------------------------------------|------------------------------------------------------------------------------------------------------------------------------------------------------------------|--------------------------------------------------------------------------------------------------------------------------|
| <b>Intervention group (Endovascular group)</b> | Mechanical thrombectomy with stent retriever (preferred) /thromboaspiration devices + standard medical therapy | Endovascular thrombectomy with angioplasty or stenting + standard medical treatment | Mechanical thrombectomy with stent retrievers, thromboaspiration, balloon angioplasty, stent deployment or intra-arterial thrombolysis + best medical management | Mechanical embolectomy (Solitaire FR or AB device) with or without adjunctive manual aspiration + best medical treatment |
| <b>Control group</b>                           | Standard medical therapy <sup>a</sup>                                                                          | Standard medical care <sup>b</sup>                                                  | Best medical management <sup>c</sup>                                                                                                                             | Best medical treatment <sup>d</sup>                                                                                      |
| <b>Primary outcome</b>                         | mRS ≤ 3 at 90 days                                                                                             | mRS ≤ 3 at 90 days                                                                  | mRS ≤ 3 at 90 days                                                                                                                                               | mRS ≤ 3 at 90 days                                                                                                       |
| <b>Centers (n)</b>                             | China (28)                                                                                                     | German (4), Italy (5), Holland (10), Norway (2), Switzerland (1)                    | China (29)                                                                                                                                                       | China (36)                                                                                                               |
| <b>Sample size (Intervention; Control)</b>     | 131 (66; 65)                                                                                                   | 300 (154; 146)                                                                      | 342 (226; 114)                                                                                                                                                   | 217 (110; 107)                                                                                                           |

**Notes:** a. according to the AHA/ASA guidelines. b. according to local protocols and national guidelines. c. according to national and institutional guidelines.

d. according to latest Chinese guidelines for acute ischemic stroke (which are very similar to the AHA/ASA guidelines).

**Abbreviations:** BAO, basilar artery occlusion; ICH, Intracerebral hemorrhage; PC-ASPECTS, posterior circulation Acute Stroke Prognosis Early CT Score(range, 0-10); mRS, modified Rankin scale (range, 0-6 [most severe]); n, number; NIHSS, National Institutes of Health Stroke Scale (range, 0-42 [most severe]); AHA/ASA, American Heart Association/American Stroke Association.
